# Supplementary material for: Discovery and Characterization of Diazenylaryl Sulfonic Acids as Inhibitors of Viral and Bacterial Neuraminidases
Source: PubMed Central journal article supplement (PMC5309245; doi:10.3389/fmicb.2017.00205), 2017-02-15
Supplement: DataSheet1.pdf [file DataSheet1.pdf]

## Supplementary Material

### Discovery and Characterization of Diazenylaryl Sulfonic Acids as Inhibitors of Viral and Bacterial Neuraminidases

Anja Hoffmann, Martina Richter, Susanne von Grafenstein, Elisabeth Walther, Zhongli Xu<sup>†</sup>, Lilia Schumann, Ulrike Grienke, Christina E. Mair, Christian Kramer, Judith M. Rollinger, Klaus R. Liedl, Michaela Schmidtke, Johannes Kirchmair<sup>\*</sup>

<sup>\*</sup> Correspondence: Johannes Kirchmair: kirchmair@zbh.uni-hamburg.de

#### 1 Supplementary Figures and Tables

##### 1.1 Supplementary Figures

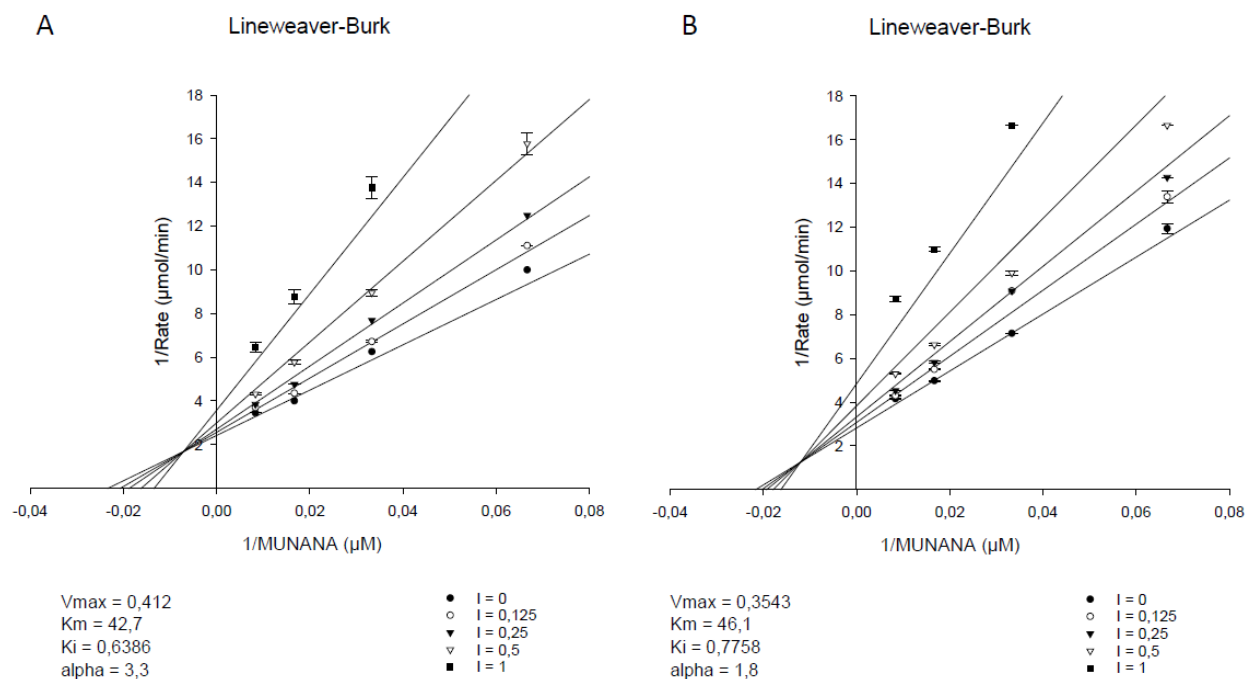

**Supplementary Figure 1.** Lineweaver-Burk plots of the enzyme kinetics influenza virus A/WSN/33 with **1**. (A) Virus was preincubated for 20 min with **1**. (B) Virus, **1**, and MUNANA were co-incubated without a pre-incubation step. The tested concentrations are shown in the legend box of each graph.

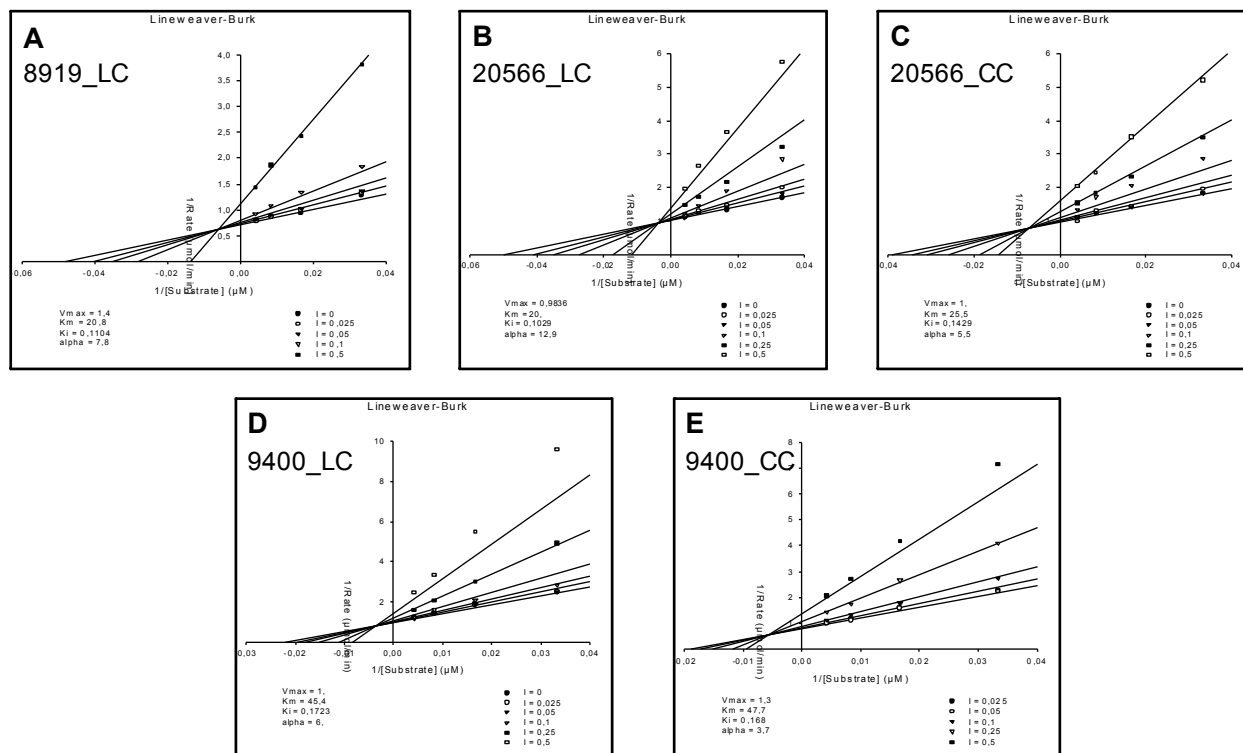

**Supplementary Figure 2.** Lineweaver-Burk plots of the enzyme kinetics of NanA with **1**. Each NanA construct was tested in three independent assays at concentrations of **1** shown in the legend box of each graph.

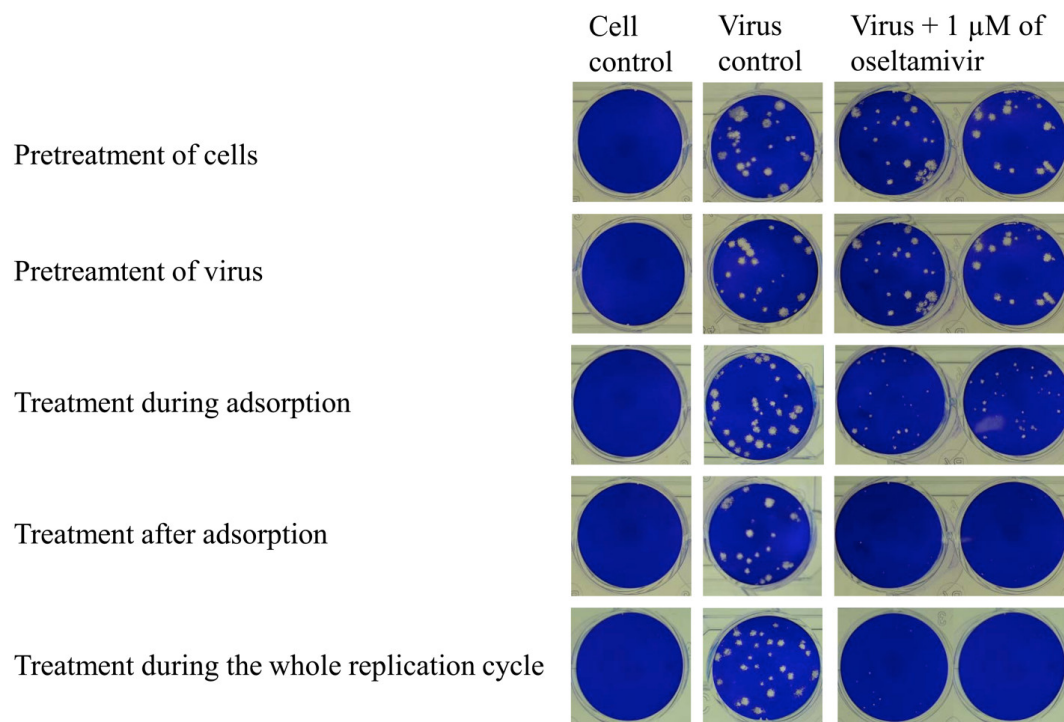

**Supplementary Figure 3.** Plaque size reduction observed after treatment with 1  $\mu$ M of oseltamivir.

## 1.2 Supplementary Tables

**Supplementary Table 1.** Assay interference phenomena of test compounds in the HA-based assay.

| Cpd.      | sample concentrations [ $\mu$ M] in |                                                                                    |                                |                                                             |                                |
|-----------|-------------------------------------|------------------------------------------------------------------------------------|--------------------------------|-------------------------------------------------------------|--------------------------------|
|           | hem-agglutination <sup>a</sup>      | viral HA-assay provoking prevention of virus-induced hemagglutination <sup>b</sup> | erythrocyte lysis <sup>c</sup> | bacterial HA-assay provoking hem-agglutination <sup>d</sup> | erythrocyte lysis <sup>e</sup> |
| <b>1</b>  | no                                  | no                                                                                 | no                             | no                                                          | no                             |
| <b>2</b>  | no                                  | 3.16-100                                                                           | no                             | no                                                          | no                             |
| <b>3</b>  | 3.16-100                            | no                                                                                 | no                             | 31.6-100                                                    | no                             |
| <b>4</b>  | 1-100                               | no                                                                                 | no                             | no                                                          | 100                            |
| <b>5</b>  | no                                  | 31.6-100                                                                           | no                             | no                                                          | no                             |
| <b>6</b>  | 100 or no                           | no                                                                                 | no                             | no                                                          | no                             |
| <b>7</b>  | 1-100                               | no                                                                                 | no                             | no                                                          | no                             |
| <b>8</b>  | no                                  | no                                                                                 | no                             | no                                                          | no                             |
| <b>9</b>  | no                                  | no                                                                                 | no                             | no                                                          | no                             |
| <b>10</b> | 100 or no                           | no                                                                                 | no                             | no                                                          | no                             |
| <b>11</b> | no                                  | no                                                                                 | no                             | no                                                          | no                             |
| <b>12</b> | no                                  | no                                                                                 | no                             | no                                                          | no                             |
| <b>13</b> | no                                  | no                                                                                 | no                             | no                                                          | no                             |
| <b>14</b> | 31.6-100                            | no                                                                                 | no                             | no                                                          | no                             |
| <b>15</b> | 100 or no                           | no                                                                                 | no                             | no                                                          | no                             |
| <b>16</b> | no                                  | no                                                                                 | no                             | no                                                          | no                             |
| <b>17</b> | no                                  | no                                                                                 | no                             | no                                                          | no                             |

<sup>a</sup>Test compound induced a hemagglutination of human erythrocytes (2 h at 4°C).

<sup>b</sup>Test compound prevented the virus-induced hemagglutination of human erythrocytes (2 h at 4°C).

<sup>c</sup>Test compounds lysed the human erythrocytes (2 h at 4°C).

<sup>d</sup>Test compound induced a hemagglutination of human erythrocytes in the presence of lectin (24 h, 4°C).

<sup>e</sup>Test compounds lysed the human erythrocytes (4 h at 37°C and 12 h at 4°C).

**Supplementary Table 2.** Virus titers (plaque-forming units, PFU) and reduction in plaque numbers by treatment with **1**.

| Experiment                                          | Untreated virus titer (PFU/ mL) | rNanA <i>S. pneumoniae</i> DSM20566 control | Virus titer after treatment with 10 $\mu$ M of <b>1</b> (PFU/ mL) | Reduction in plaque numbers (%)    | Mean reduction in plaque numbers $\pm$ SD (%) |
|-----------------------------------------------------|---------------------------------|---------------------------------------------|-------------------------------------------------------------------|------------------------------------|-----------------------------------------------|
| I                                                   | 14 750                          | -                                           | 900                                                               | 93.90                              | 94.12 $\pm$ 3.06                              |
|                                                     |                                 |                                             | 1 300                                                             | 91.19                              |                                               |
|                                                     | 20 500                          | +                                           | 400                                                               | 97.29                              |                                               |
|                                                     |                                 |                                             | 1 300                                                             | 93.66                              |                                               |
| II                                                  | 11 167                          | -                                           | 300                                                               | 98.54                              | 96.10 $\pm$ 3.45                              |
|                                                     |                                 |                                             | 480                                                               | 95.70                              |                                               |
|                                                     | 20 750                          | +                                           | 310                                                               | 97.22                              |                                               |
|                                                     |                                 |                                             | 560                                                               | 97.30                              |                                               |
|                                                     |                                 |                                             | 370                                                               | 98.76                              | 97.76 $\pm$ 0.65                              |
| <b>Mean <math>\pm</math> SD of both experiments</b> |                                 | <b>In the absence of pneumococcal NA</b>    |                                                                   | <b>95.29 <math>\pm</math> 1.65</b> |                                               |
|                                                     |                                 | <b>In the presence of pneumococcal NA</b>   |                                                                   | <b>96.93 <math>\pm</math> 1.17</b> |                                               |

**Supplementary Table 3.** Effect of **1** and **2** on *S. pneumoniae* in comparison to the control antibiotic imipenem.

| Compound | Tested compound concentration ( $\mu$ M) | cfu per agar plate | Number of replicates | Activity       |
|----------|------------------------------------------|--------------------|----------------------|----------------|
| Imipenem | 0.1                                      | < 150              | 3                    | bactericidal   |
| <b>1</b> | 50                                       | > 150 <sup>a</sup> | 2                    | bacteriostatic |
| <b>2</b> | 50                                       | > 150 <sup>a</sup> | 2                    | bacteriostatic |
|          | 25                                       | > 150 <sup>a</sup> | 2                    | bacteriostatic |

<sup>a</sup>Abundant bacterial growth. The exact number of colony forming units was not determined.
